# Supplementary material
Source: publisher figshare collection journal article supplement (https://frontiersin.figshare.com/ndownloader/files/21104421)
Supplement: Supplementary file [file 21104421]

## Supplementary Material

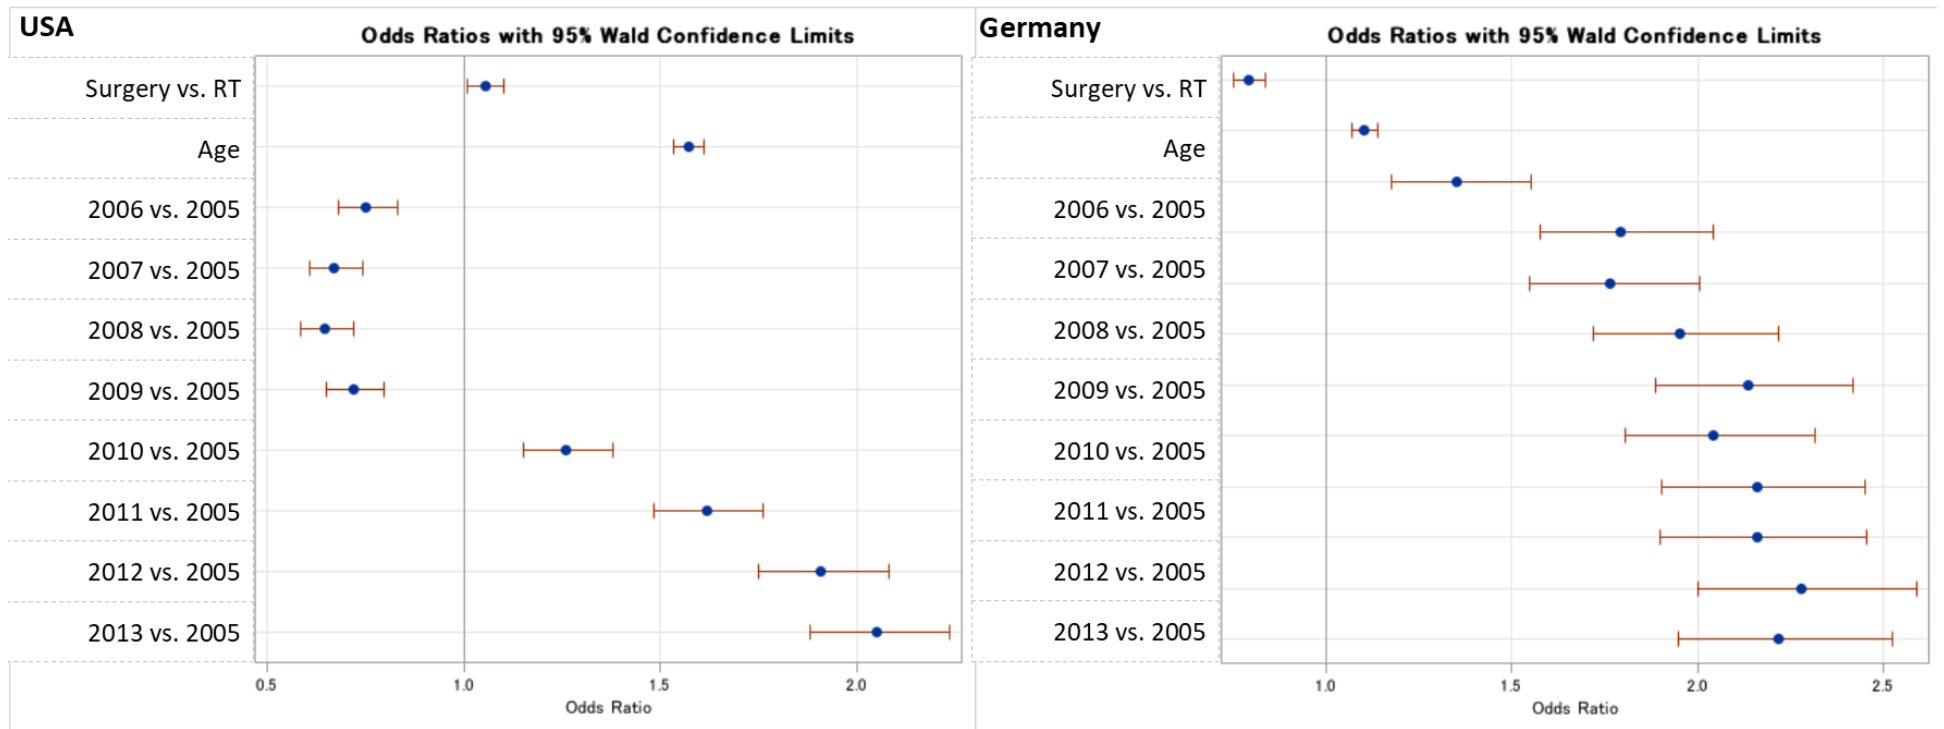

**Figure S1:** Pattern of missing data from multivariate logistic regression models predicting missing values.

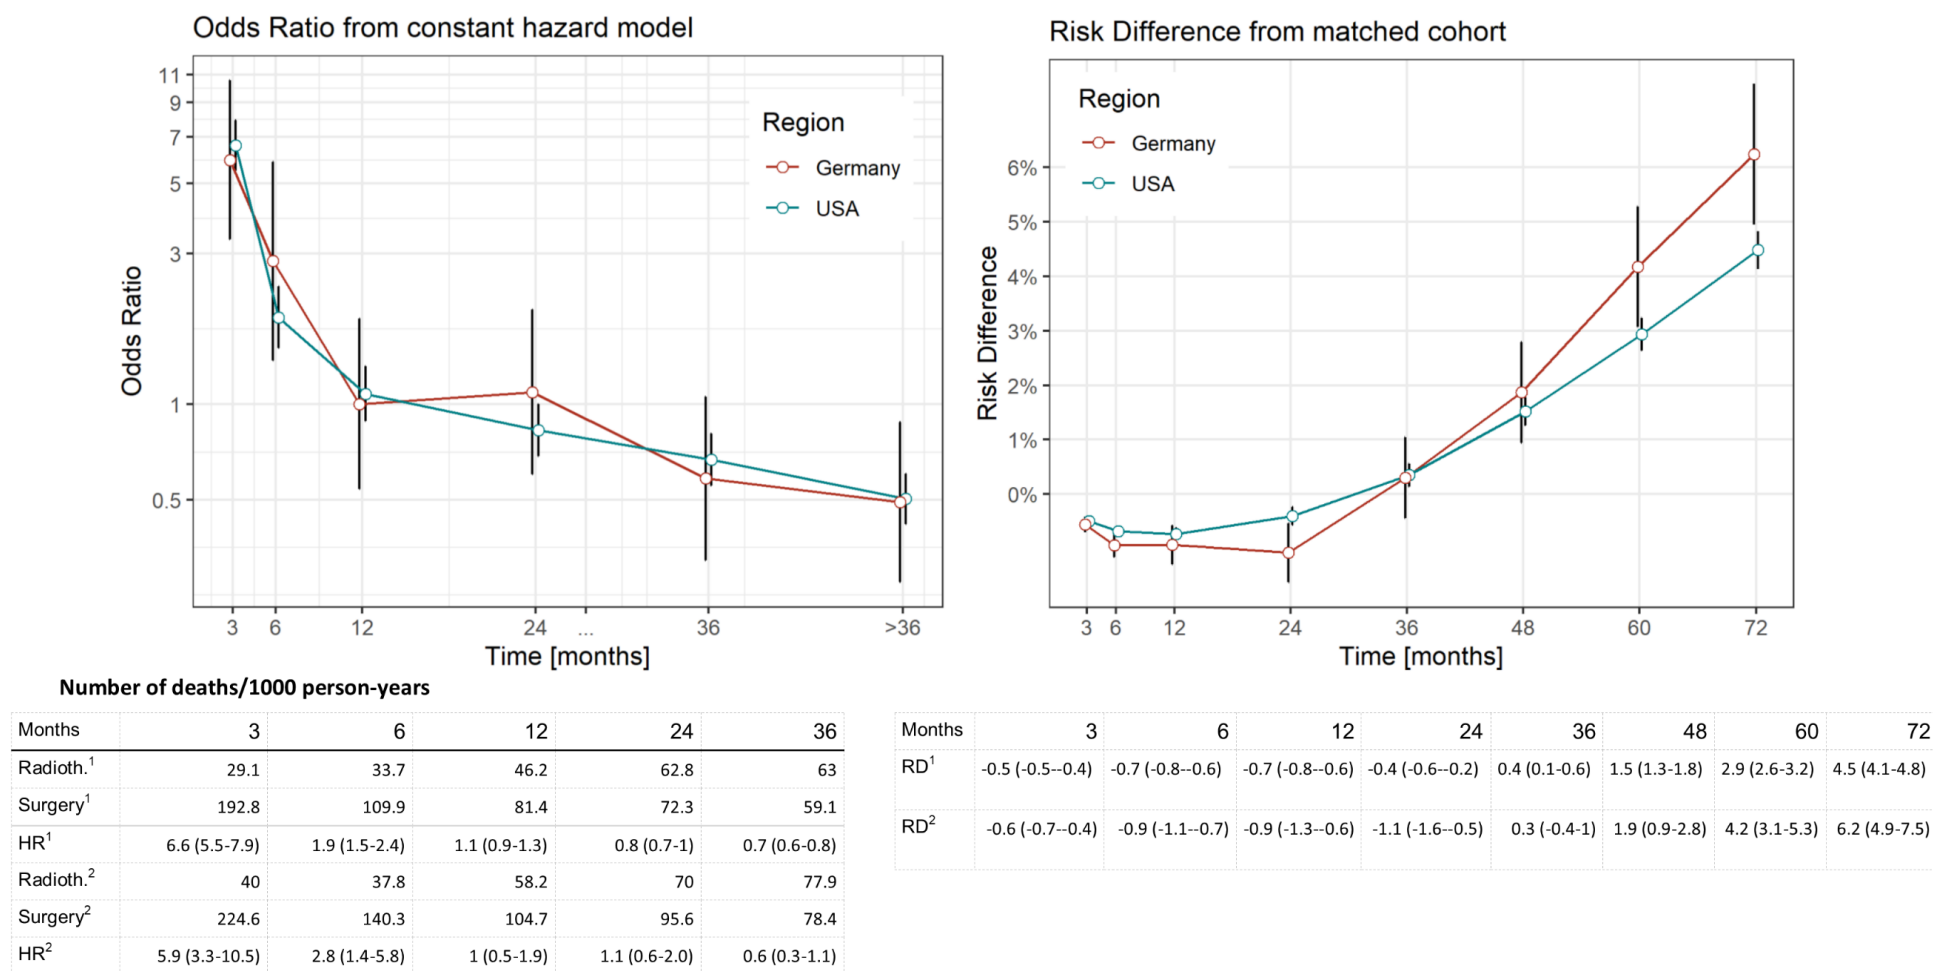

**Figure S2:** Results of univariate unadjusted analyses. A) Results from piecewise regression models and crude risk differences from Kaplan-Meier estimates. B) Kaplan-Meier plots with hazard ratios computed from Cox regression models.

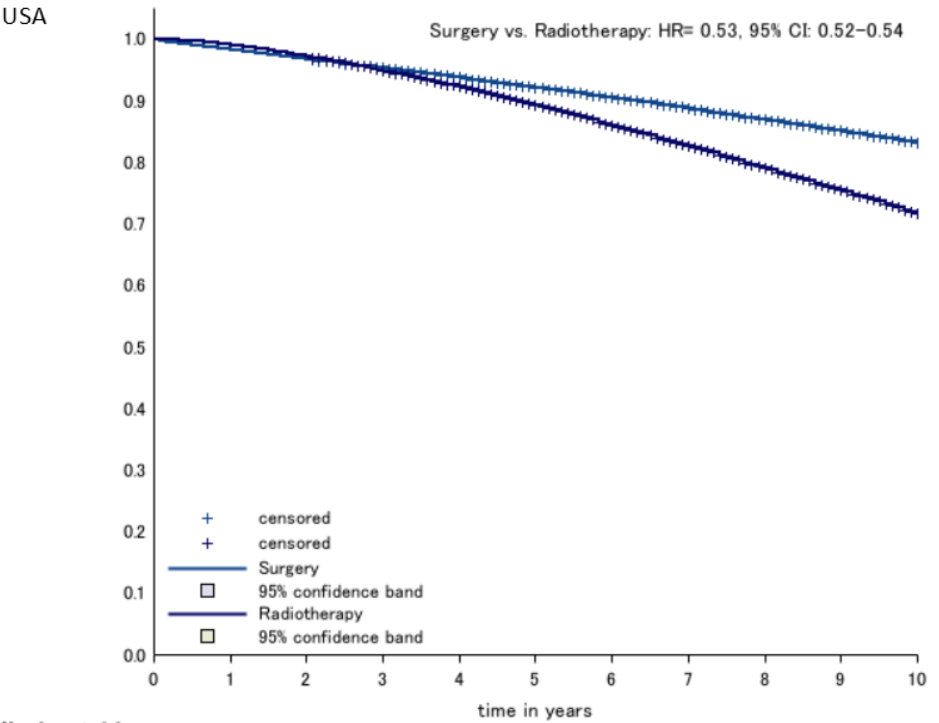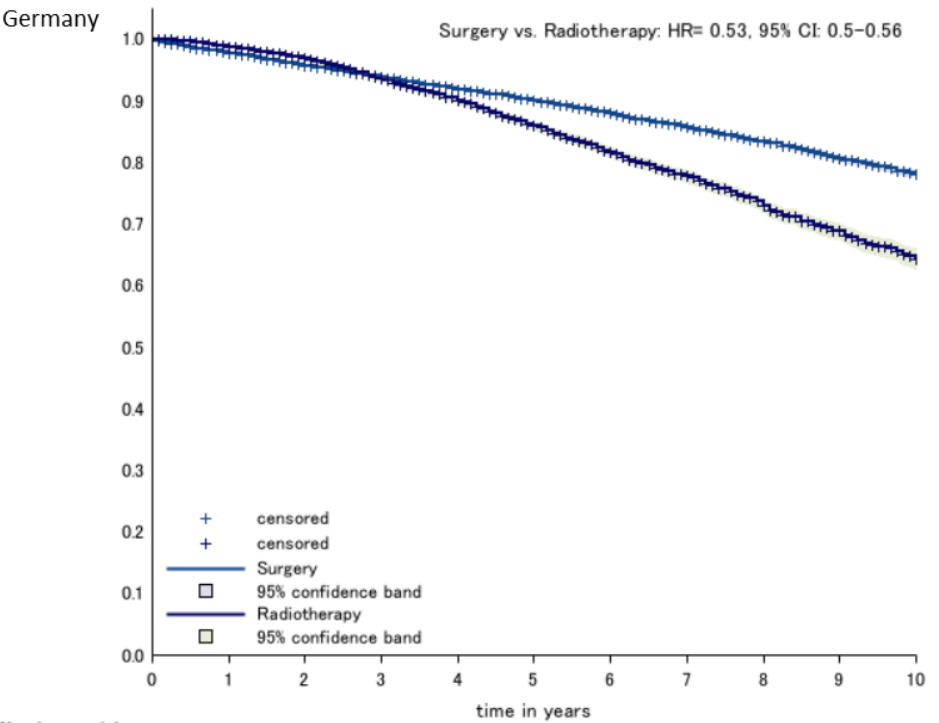

**Figure S3:** Sensitivity analysis of cases with low risk prostate cancer and an age below 60 at time of diagnosis.

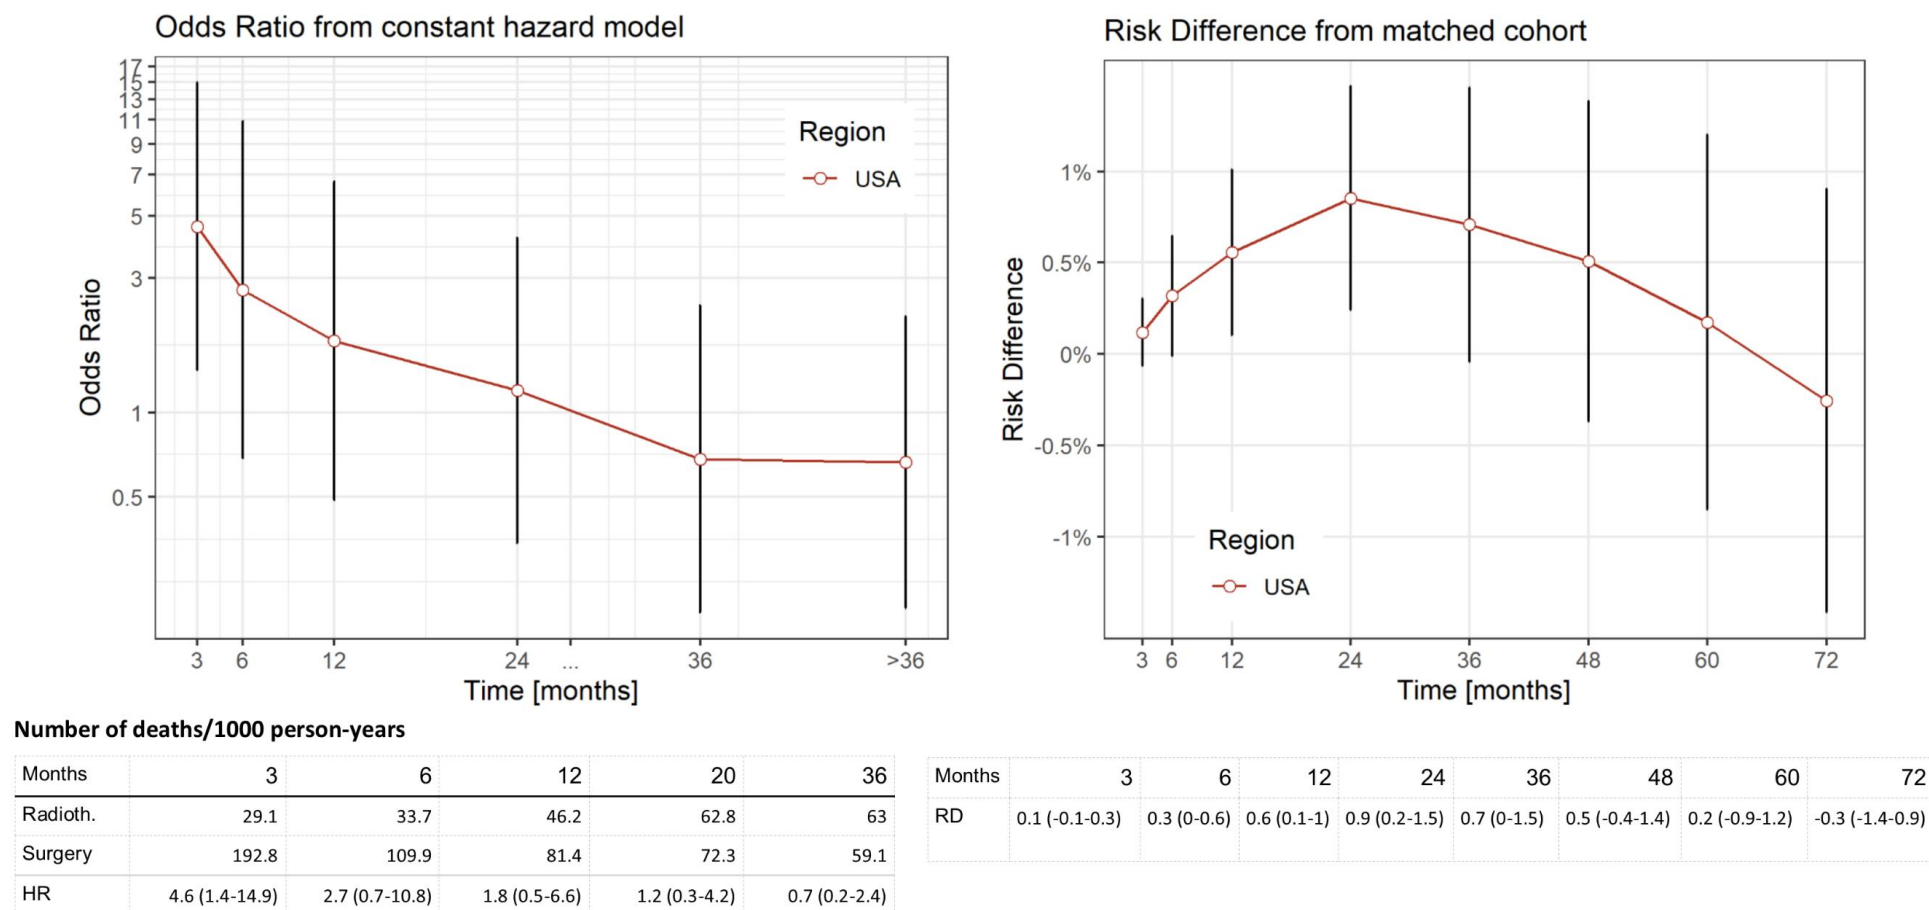

**Figure S4:** Results from complete case models. A) Results from piecewise regression models B) Results from Cox regression models analyzing the temporal course

**Table S1:** Numbers of proportions of missing data.

|                   | SEER data     | Germany        |
|-------------------|---------------|----------------|
| Year of diagnosis | 0             | 0              |
| Survival time     | 0             | 0              |
| TNM Stage         | 10164 (2.30%) | 514 (0.72%)    |
| Age               | 0             | 0              |
| Grade             | 12261 (2.78%) | 12593 (17.73%) |
| Treatment         | 9892 (2.24%)  | 0              |

**Table S2:** Basic characteristics after propensity score matching (complete data), \* if selected by year-specific model

| USA                      | Radiotherapy        |      | Surgery             |      |
|--------------------------|---------------------|------|---------------------|------|
|                          | Mean [95% CI]       |      | Mean [95% CI]       |      |
| Age                      | 66.5 [66.5-66.6]    |      | 66.9 [66.8-70.0]    |      |
| Propensity Score         | 0.564 [0.562-0.566] |      | 0.564 [0.562-0.566] |      |
| Frequency values         |                     |      |                     |      |
|                          | n                   | %    | n                   | %    |
| Gleason ≤6               | 32399               | 50.5 | 31109               | 48.5 |
| Gleason >6               | 31747               | 49.5 | 33037               | 51.5 |
|                          |                     |      |                     |      |
| Locally limited (T1/T2)  | 60249               | 93.9 | 59592               | 92.9 |
| Locally advanced (T3/T4) | 2907                | 4.5  | 3477                | 5.4  |
| Node-positive            | 990                 | 1.5  | 1077                | 1.7  |
| Germany                  | Radiotherapy        |      | Surgery             |      |
|                          | Mean [95% CI]       |      | Mean [95% CI]       |      |
| Age                      | 71.1 [71.0-71.3]    |      | 71.0 [70.9-71.2]    |      |
| Propensity Score         | 0.350 [0.346-0.353] |      | 0.351 [0.347-0.355] |      |
| Frequency values         |                     |      |                     |      |
|                          |                     |      |                     |      |
|                          | n                   | %    | n                   | %    |
| Gleason ≤6               | 1194                | 75.4 | 1187                | 75.0 |
| Gleason >6               | 389                 | 25.2 | 395                 | 26.1 |
|                          |                     |      |                     |      |
| Locally limited (T1/T2)  | 6906                | 86.9 | 6887                | 86.6 |
| Locally advanced (T3/T4) | 822                 | 10.3 | 842                 | 10.6 |
| Node-positive            | 222                 | 2.8  | 221                 | 2.8  |
